# Supplementary material for: Exploring Risk and Resilient Profiles for Functional Impairment and Baseline Predictors in a 2-Year Follow-Up First-Episode Psychosis Cohort Using Latent Class Growth Analysis
Source: PubMed Central journal article supplement (PMC7796026; doi:10.3390/jcm10010073), 2020-12-28
Supplement: jcm-10-00073-s001.pdf [file jcm-10-00073-s001.pdf]

**Table S1.** Comparison between participants who completed the assessment and those who dropped-out.

| BASELINE CHARACTERISTICS                                 | Baseline                       |                           |                  |                  | 12-month follow-up             |                           |                  |             | 24-month follow-up             |                            |                  |             |
|----------------------------------------------------------|--------------------------------|---------------------------|------------------|------------------|--------------------------------|---------------------------|------------------|-------------|--------------------------------|----------------------------|------------------|-------------|
|                                                          | Non-drop-out<br><i>n</i> = 261 | Drop-out<br><i>n</i> = 14 | U/X <sup>2</sup> | <i>p</i>         | Non-drop-out<br><i>n</i> = 203 | Drop-out<br><i>n</i> = 72 | U/X <sup>2</sup> | <i>p</i>    | Non-drop-out<br><i>n</i> = 157 | Drop-out<br><i>n</i> = 118 | U/X <sup>2</sup> | <i>p</i>    |
| Age (years) <sup>a</sup>                                 | 25.0(9)                        | 24.7(10)                  | 1,850            | 0.94             | 24.8(8)                        | 25.4(10)                  | 8,115.5          | 0.16        | 25.0(9)                        | 25.1(8)                    | 9903.5           | 0.33        |
| Sex (Female) <sup>b</sup>                                | 87(33.3)                       | 6(42.9)                   | 0.54             | 0.46             | 62(30.5)                       | 31(43.1)                  | 3.72             | 0.05        | 53(33.8)                       | 40(33.9)                   | 0.001            | 0.98        |
| Marital status (Single) <sup>b</sup>                     | 222(85.1)                      | 11(78.6)                  | 0.43             | 0.51             | 177(87.2)                      | 56(77.8)                  | 3.64             | 0.06        | 138(87.9)                      | 95(80.5)                   | 2.84             | 0.09        |
| Ethnicity (Caucasian) <sup>b</sup>                       | 228(87.4)                      | 8(57.1)                   | 9.97             | <b>0.002</b>     | 181(89.2)                      | 55(76.4)                  | 7.13             | <b>0.01</b> | 138(87.9)                      | 98(83.0)                   | 1.30             | 0.25        |
| Parental socioeconomic status (Medium-high) <sup>b</sup> | 141(54.6)                      | 5(35.7)                   | 0.36             | 0.55             | 111(54.9)                      | 35(48.6)                  | 0.15             | 0.70        | 89(57.0)                       | 57(48.3)                   | 1.15             | 0.28        |
| Living situation (Living independently) <sup>b</sup>     | 55(21.1)                       | 5(35.7)                   | 1.67             | 0.20             | 42(20.7)                       | 18(25.0)                  | 0.58             | 0.45        | 34(21.7)                       | 26(22.0)                   | 0.01             | 0.94        |
| Educational level (Higher education) <sup>b</sup>        | 115(44.2)                      | 5(35.7)                   | 0.39             | 0.53             | 85(42.1)                       | 35(48.6)                  | 0.92             | 0.34        | 71(45.5)                       | 49(41.5)                   | 0.43             | 0.51        |
| Occupational status (Active *) <sup>b</sup>              | 136(52.1)                      | 6(42.6)                   | 0.45             | 0.50             | 105(51.7)                      | 37(51.4)                  | 0.002            | 0.96        | 83(52.9)                       | 59(50.0)                   | 0.22             | 0.64        |
| Somatic comorbidity (Yes) <sup>b</sup>                   | 73(28.0)                       | 1(0.1)                    | 3.28             | 0.19             | 60(29.6)                       | 14(19.4)                  | 2.79             | 0.25        | 47(29.9)                       | 27(22.9)                   | 1.74             | 0.42        |
| Family history psychiatric disorder (Yes) <sup>b</sup>   | 146(55.9)                      | 4(28.6)                   | 4.01             | <b>0.04</b>      | 119(58.6)                      | 31(43.0)                  | 5.19             | <b>0.02</b> | 96(61.1)                       | 54(45.8)                   | 6.43             | <b>0.01</b> |
| Substance use (Yes) <sup>b</sup>                         | 47(18.0)                       | 3(21.4)                   | 40.97            | <b>&lt;0.001</b> | 33(16.3)                       | 17(23.6)                  | 8.14             | <b>0.02</b> | 25(15.9)                       | 25(21.2)                   | 4.20             | 0.12        |

<sup>a</sup> Values are indicated as median (Interquartile Range). <sup>b</sup> Values are indicated as *n* (%). \* Active includes workers and students. Bold type indicates *p* < 0.05.
